# Supplementary material for: Interaction between the NS4B amphipathic helix, AH2, and charged lipid headgroups alters membrane morphology and AH2 oligomeric state — Implications for the Hepatitis C virus life cycle
Source: Biochim Biophys Acta. 2015 Aug;1848(8):1671–7. doi: 10.1016/j.bbamem.2015.04.015 (PMC4768108; doi:10.1016/j.bbamem.2015.04.015)
Supplement: Supplementary file 1 — Supplementary material 1. [file mmc1.pdf]

## **Supplementary Information**

### **Interaction between the NS4B amphipathic helix, AH2, and charged lipid headgroups alters membrane morphology and AH2 oligomeric state - implications for the Hepatitis C Virus life cycle.**

Esther L. Ashworth Briggs<sup>1</sup>, Rafael Gomes<sup>1,2</sup>, Malaz Elhussein<sup>3</sup>, William Collier<sup>1</sup>, I. Stuart Findlow<sup>1</sup>, Syma Khalid<sup>3</sup>, Chris J. McCormick<sup>2\*</sup>, Philip T.F. Williamson<sup>1\*</sup>

<sup>1</sup>Centre for Biological Sciences/Institute for Life Sciences, University of Southampton, Highfield Campus, Southampton, SO17 1BJ, United Kingdom. <sup>2</sup>School of Medicine, University of Southampton, Southampton, SO16 6YD, United Kingdom. <sup>3</sup>School of Chemistry, University of Southampton, Southampton, SO17 1BJ, United Kingdom.

Corresponding authors:

P.T.Williamson@soton.ac.uk

C.J.McCormick@soton.ac.uk

## Figures

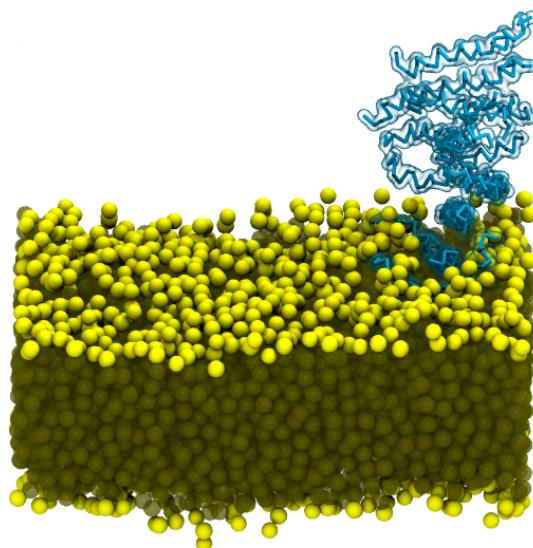

**Supplementary Figure 1.** Representative snapshot of an AH2 oligomer interacting with the surface of a POPC bilayer. Interactions are mediated by two AH2 molecules, with the oligomeric structure being formed primarily from protein/protein interactions.
